# Supplementary material
Source: Springer Nature journal article supplement (https://www.springermedizin.de/resource/supplementary/12990_2013_590_MOESM5_ESM.pdf/9613580)

# Spinal reflexes

## A Sham control

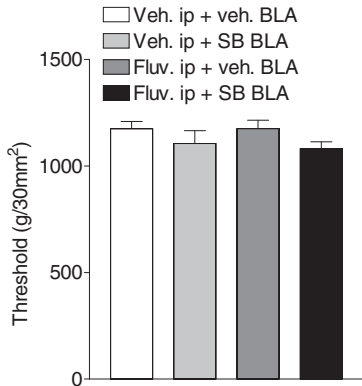

## B Arthritis

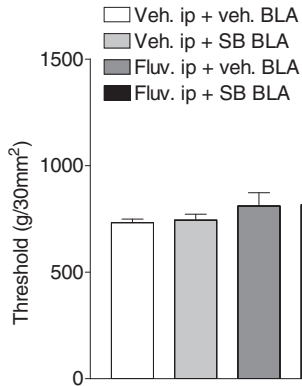

Supplement: MOESM5 [file 9613580]
